# Supplementary material for: Magnetic Micromanipulation for In Vivo Measurement of Stiffness Heterogeneity and Anisotropy in the Mouse Mandibular Arch
Source: PubMed Central journal article supplement (PMC7327709; doi:10.34133/2020/7914074), 2020-06-22

Supplementary Figure 1

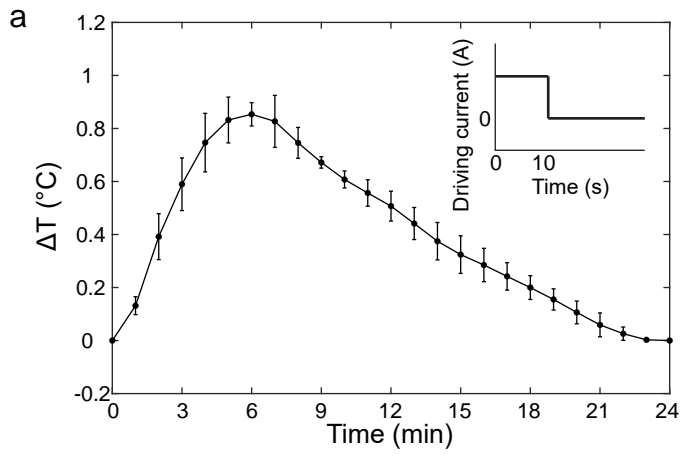

# Supplementary Figure 2

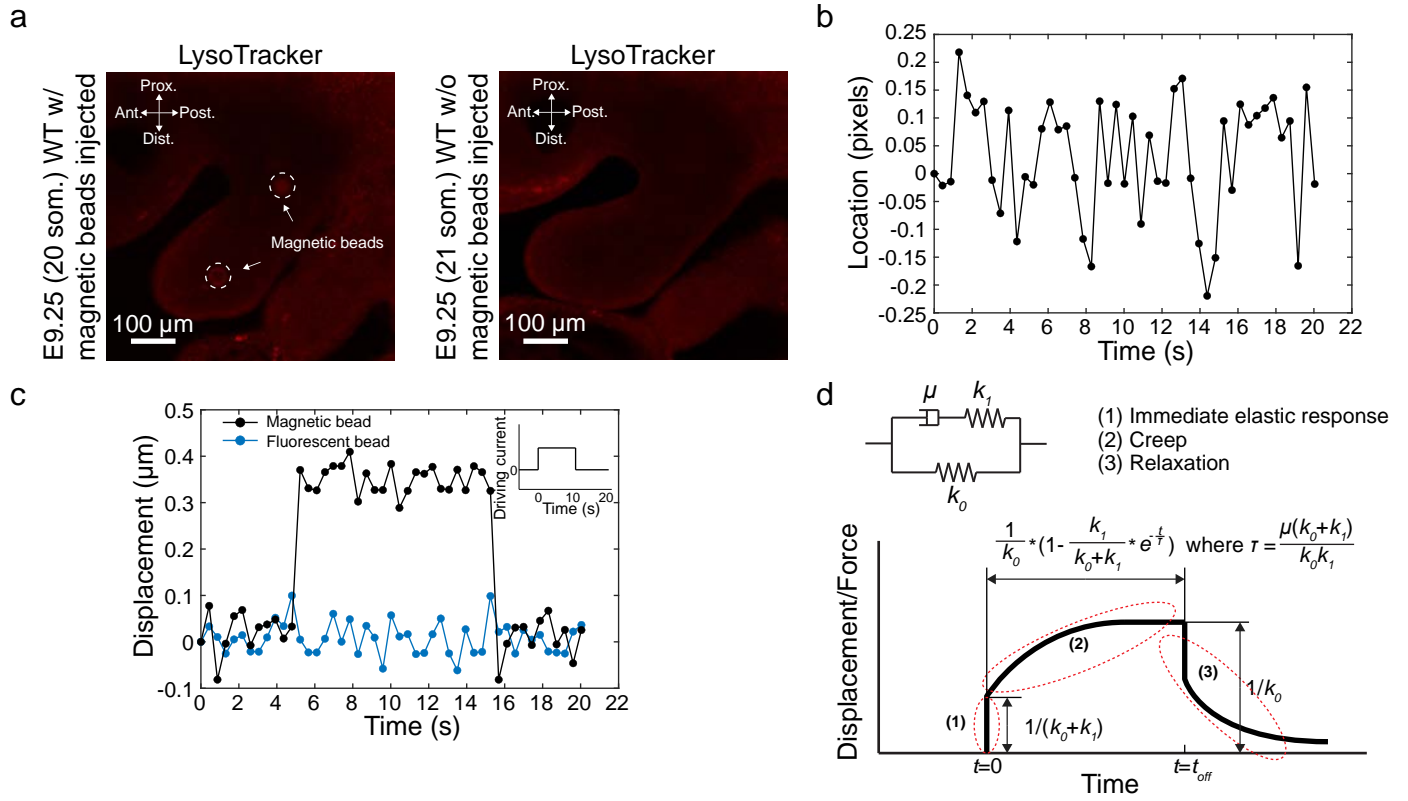

Supplement: 7914074.f1.pdf [file 7914074.f1.pdf]
